# Supplementary material for: High-Performance Catalytic Reduction of 4-Nitrophenol to 4-Aminophenol over Pt Nanoparticles Supported on Co-Al LDH Nanosheets
Source: MDPI journal article supplement (doi:10.3390/cryst14030284), 2024-03-19
Supplement: s1 [file s1]

Supplementary Material

**High-performance catalytic reduction of 4-nitrophenol to 4-aminophenol over Pt nanoparticles supported on Co-Al LDH nanosheets**

Chenzhe Xu<sup>a</sup>, Yue Qiu<sup>a</sup>, Xiaoting Yang<sup>a</sup>, Zifei Gao<sup>a</sup>, Zheng Wang<sup>a</sup>, Cai Liu<sup>a</sup>, Yanran Sun<sup>a</sup>, Juanjuan Ma<sup>a,b,\*</sup>, Lin Liu<sup>a,b,\*</sup>

<sup>a</sup> School of Environmental and Chemical Engineering, Jiangsu Ocean University, Lianyungang, 222005, China

<sup>b</sup> Jiangsu Key Laboratory of Marine Bioresources and Environment, Lianyungang, 222005, China

Address correspondence to E-mail: majj@jou.edu.cn; liulin@jou.edu.cn

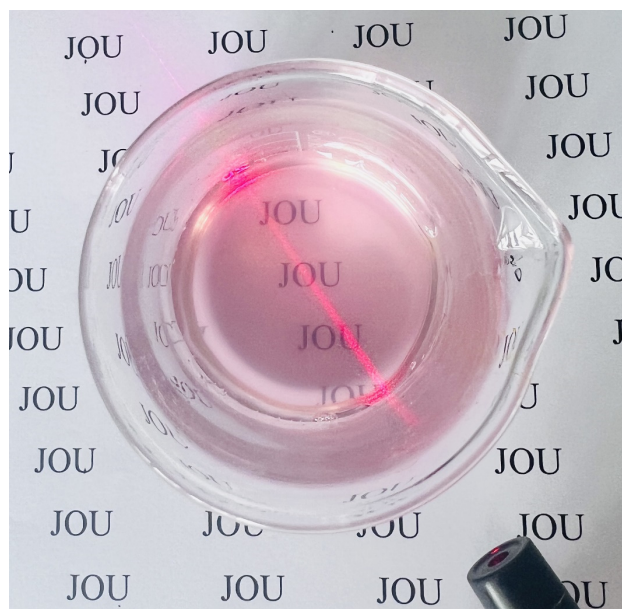

**Fig. S1.** Tyndall phenomenon of LDH nanosheets colloidal dispersion.

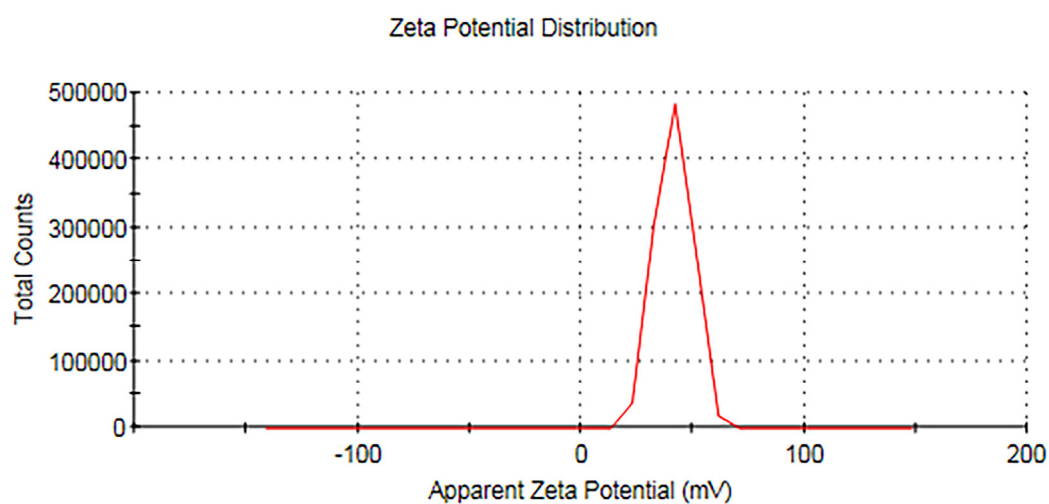

**Fig. S2.** Zeta potential of Co-Al LDH nanosheets.

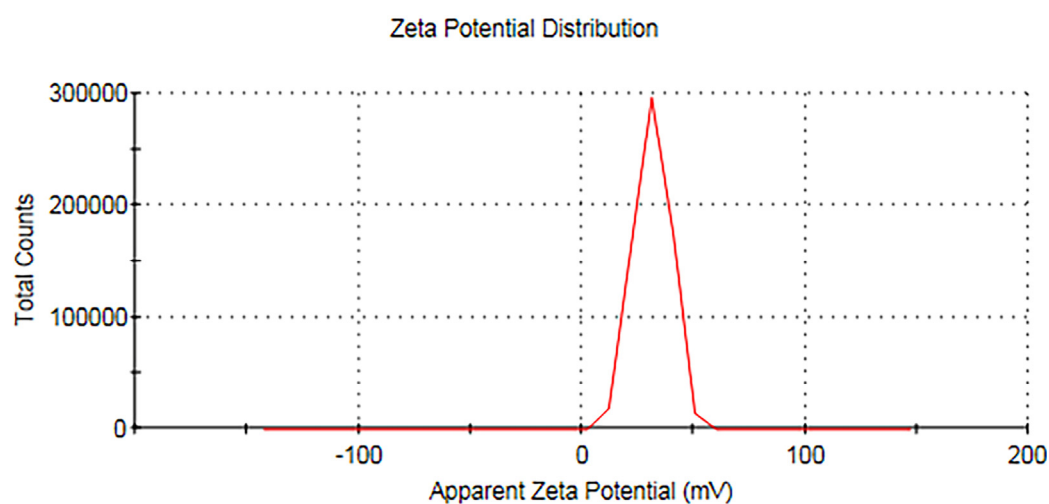

**Fig. S3.** Zeta potential of PtCl<sub>6</sub><sup>2-</sup>@Co-Al LDH nanosheets.

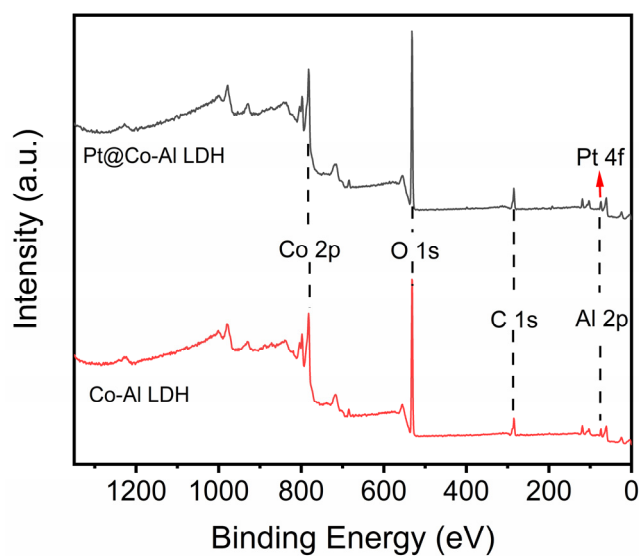

**Fig. S4.** XPS survey spectra of Co-Al LDH and Pt@Co-Al LDH.

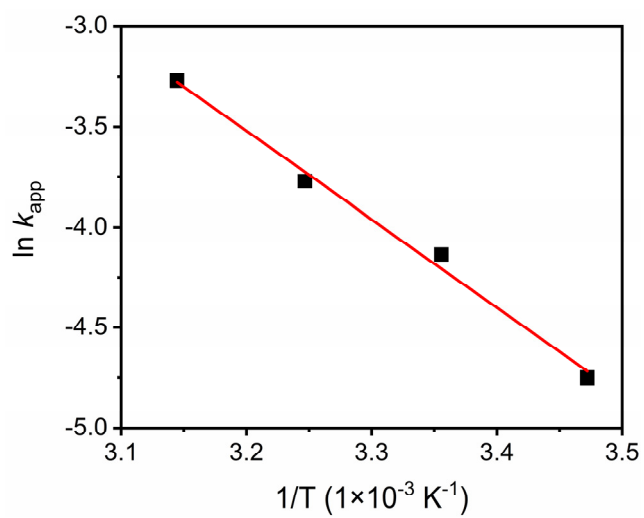

**Fig. S5.** Arrhenius plot for catalytic reduction of 4-NP in the presence of Pt@Co-Al LDH.

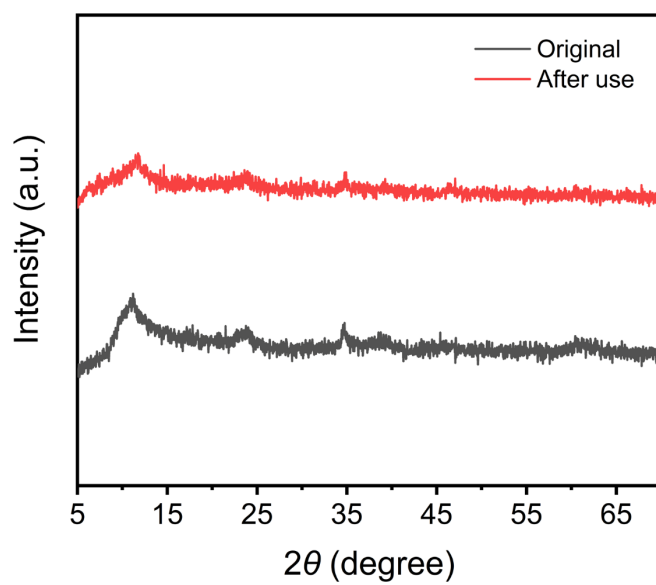

**Fig. S6.** XRD patterns of the original and recycled Pt@Co-Al LDH catalyst.

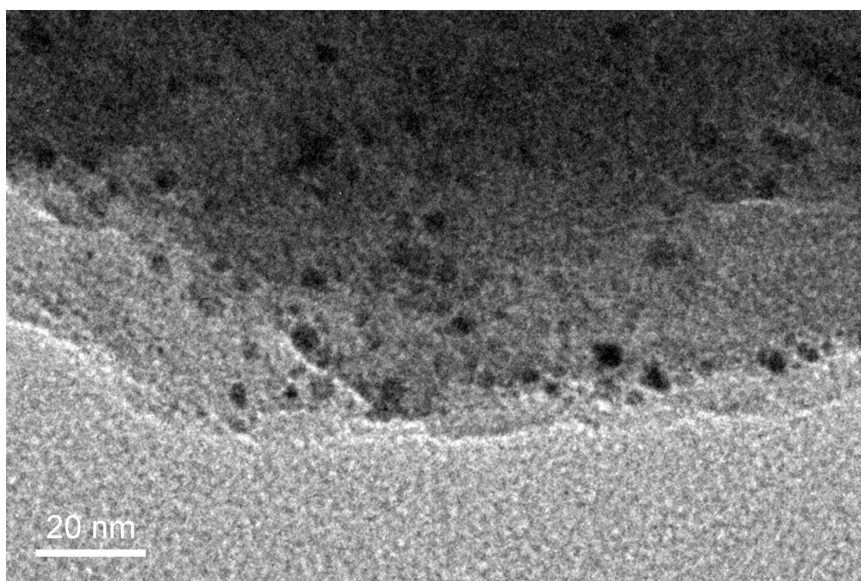

**Fig. S7.** HRTEM image of the recycled Pt@Co-Al LDH.

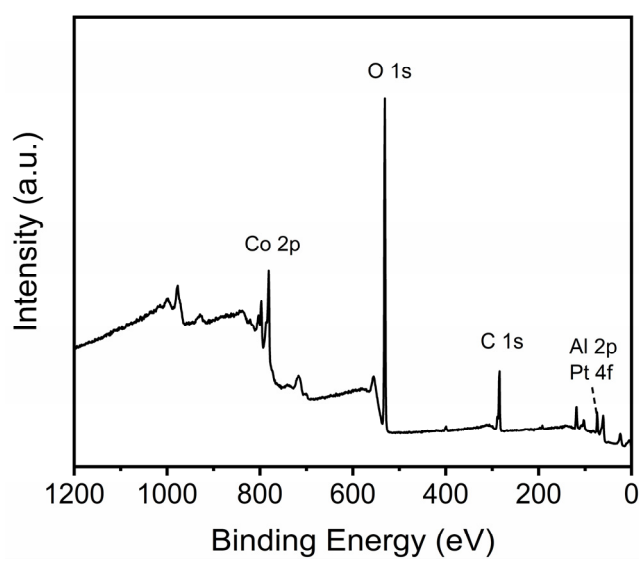

**Fig. S8.** XPS survey spectrum of the recycled Pt@Co-Al LDH.

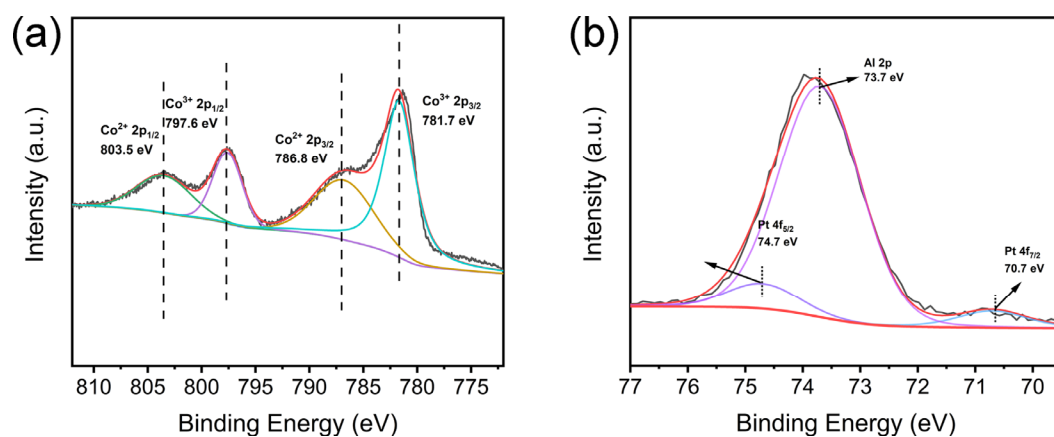

**Fig. S9.** The high-resolution XPS spectra of (a) Co 2p, (b) Al 2p and Pt 4f for the recycled Pt@Co-Al LDH.
